# Supplementary material
Source: PubMed Central journal article supplement (PMC7365022)
Supplement: NIHMS1063747-supplement-1.pdf [file NIHMS1063747-supplement-1.pdf]

**SUPPLEMENTAL CONTENT: State and regional gaps in coverage of “Tobacco 21”  
policies**

Eric C. Leas PhD MPH<sup>1,2</sup>, Nina C. Schleicher PhD<sup>1</sup>, Amanda Recinos MS<sup>3</sup>, Maggie Mahoney  
JD,<sup>4</sup> Lisa Henriksen, PhD<sup>1</sup>

<sup>1</sup> Stanford Prevention Research Center, Stanford University School of Medicine, Palo Alto CA

<sup>2</sup> Division of Health Policy, Department of Family Medicine and Public Health, University of  
California: San Diego, School of Medicine

<sup>3</sup> GreenInfo Network, Oakland, CA

<sup>4</sup> Public Health Policy Attorney

**Table 1. Type of Tobacco 21 coverage, legal preemption and percent of population covered, by age group and state**

| State                | Type of coverage† | Legal Preemption‡ | Residents ages 15-17 |       | Residents ages 18-20 |       |
|----------------------|-------------------|-------------------|----------------------|-------|----------------------|-------|
|                      |                   |                   | N                    | %     | N                    | %     |
| Alabama §            | None              | No                | 192731               | 0.0   | 205063               | 0.0   |
| Alaska §             | Partial           | No                | 30082                | 1.1   | 30618                | 1.0   |
| Arizona              | Partial           | No                | 272870               | 0.3   | 286722               | 0.4   |
| Arkansas §           | Partial           | No                | 119237               | 1.2   | 125926               | 1.0   |
| California           | Full              | Yes               | 1564955              | 100.0 | 1664166              | 100.0 |
| Colorado             | Partial           | No                | 203520               | 0.3   | 217892               | 0.3   |
| Connecticut          | Partial           | No                | 145740               | 3.5   | 158352               | 5.7   |
| Delaware             | None              | Yes               | 34607                | 0.0   | 39815                | 0.0   |
| District of Columbia | Full              | No                | 15549                | 100.0 | 34274                | 100.0 |
| Florida              | None              | No                | 709706               | 0.0   | 750875               | 0.0   |
| Georgia              | None              | No                | 420514               | 0.0   | 444739               | 0.0   |
| Hawaii               | Full              | No                | 48065                | 100.0 | 51117                | 100.0 |
| Idaho                | None              | No                | 71487                | 0.0   | 68524                | 0.0   |
| Illinois             | Partial           | No                | 520622               | 30.5  | 526275               | 33.4  |
| Indiana              | None              | Yes               | 272447               | 0.0   | 289016               | 0.0   |
| Iowa                 | None              | Yes               | 122159               | 0.0   | 142459               | 0.0   |
| Kansas               | Partial           | No*               | 118944               | 30.8  | 128215               | 24.7  |
| Kentucky             | None              | Yes               | 171689               | 0.0   | 182627               | 0.0   |
| Louisiana            | None              | Yes               | 184430               | 0.0   | 194349               | 0.0   |
| Maine                | Full              | No                | 47981                | 100.0 | 52056                | 100.0 |
| Maryland             | None              | No                | 230882               | 0.0   | 239484               | 0.0   |
| Massachusetts        | Full              | No                | 251578               | 100.0 | 315197               | 100.0 |
| Michigan             | Partial           | Yes*              | 404840               | 5.1   | 430873               | 7.5   |
| Minnesota            | Partial           | No                | 213587               | 15.1  | 216777               | 18.1  |
| Mississippi          | Partial           | Yes               | 123844               | 0.5   | 137789               | 0.4   |
| Missouri             | Partial           | No                | 238769               | 24.7  | 254094               | 28.0  |
| Montana              | None              | Yes               | 37236                | 0.0   | 43338                | 0.0   |
| Nebraska             | None              | No                | 75154                | 0.0   | 82711                | 0.0   |
| Nevada               | None              | Yes               | 110872               | 0.0   | 102179               | 0.0   |
| New Hampshire        | Partial           | No                | 50844                | 3.2   | 58159                | 6.4   |
| New Jersey           | Full              | No                | 356313               | 100.0 | 337673               | 100.0 |
| New Mexico           | None              | Yes               | 84138                | 0.0   | 88207                | 0.0   |
| New York             | Partial           | No                | 735437               | 73.9  | 835077               | 71.1  |
| North Carolina       | None              | Yes               | 385891               | 0.0   | 420191               | 0.0   |
| North Dakota         | None              | No                | 25623                | 0.0   | 36079                | 0.0   |

|                |         |     |         |       |         |       |
|----------------|---------|-----|---------|-------|---------|-------|
| Ohio           | Partial | No  | 465105  | 15.6  | 479930  | 21.7  |
| Oklahoma       | None    | Yes | 154324  | 0.0   | 163914  | 0.0   |
| Oregon         | Full    | No  | 147313  | 100.0 | 153873  | 100.0 |
| Pennsylvania   | None    | Yes | 481595  | 0.0   | 550400  | 0.0   |
| Rhode Island   | Partial | No* | 38781   | 4.0   | 54276   | 2.4   |
| South Carolina | None    | Yes | 182587  | 0.0   | 206717  | 0.0   |
| South Dakota   | None    | Yes | 33160   | 0.0   | 36836   | 0.0   |
| Tennessee      | None    | Yes | 254404  | 0.0   | 263106  | 0.0   |
| Texas          | Partial | No  | 1165199 | 5.2   | 1176865 | 5.7   |
| Utah           | None    | No  | 140824  | 0.0   | 132213  | 0.0   |
| Vermont        | None    | No  | 23042   | 0.0   | 31697   | 0.0   |
| Virginia       | None    | No  | 313265  | 0.0   | 354421  | 0.0   |
| Washington     | None    | Yes | 267550  | 0.0   | 273868  | 0.0   |
| West Virginia  | None    | No  | 65917   | 0.0   | 73095   | 0.0   |
| Wisconsin      | None    | Yes | 225177  | 0.0   | 243301  | 0.0   |
| Wyoming        | None    | Yes | 21992   | 0.0   | 24650   | 0.0   |

† None = No Tobacco 21 laws; Full = Statewide Tobacco 21 law; Partial = Local Tobacco 21 laws only

‡ Source: <https://healthdata.gov/dataset/cdc-state-system-tobacco-legislation-preemption>. Other analyses have reached a different conclusion regarding local authority in Michigan. Berman ML. "Raising the Tobacco Sales Age to 21: Surveying the Legal Landscape." Public Health Rep. 2016;131(2):378-381.

§ Alabama, Alaska and Arkansas have age 19 sales restrictions for tobacco; however, the census does not allow separation of 18 and 19 year age groups, so the 15-17 and 18-19 categories were retained.

\* There are pending lawsuits in Kansas, Michigan, and Rhode Island, to determine whether local governments have the authority to adopt Tobacco 21 laws. For more information, see: The Topeka Capital-Journal, "Topeka appeals tobacco ruling, requests Kansas Supreme Court hear case." May 2, 2018 (available from: <https://www.cjonline.com/news/20180502/topeka-appeals-tobacco-ruling-requests-kansas-supreme-court-hear-case>); Public Health Law Center. Amicus brief in RPF Oil Co. v. Genesee Cty. June 13, 2017 (available from: <https://www.publichealthlawcenter.org/amicus-briefs/rpf-oil-co-v-genesee-cty-and-genesee-cty-health-dep%E2%80%99t-genesee-cty-circuit-ct-case-no>); Public Health Law Center. Amicus brief in K&W Automotive v. Barrington. June 1, 2018 (available from: <https://www.publichealthlawcenter.org/amicus-briefs/k-w-automotive-v-barrington-no-pc-2018-0471-providence-ri-sc-2018>).
